# Supplementary material for: Effectiveness of Immature Asian Pear Extract on Pulmonary Injury Caused by Particulate Matter in Mice
Source: MDPI journal article supplement (doi:10.3390/app13179578), 2023-08-24
Supplement: s1 [file s1]

# Effectiveness of Immature Asian Pear Extract on Pulmonary injury Caused by Particulate Matter in Mice

Mi Ran Kim <sup>1,†</sup>, Jin-Hwa Lee <sup>1,†</sup>, Mo-Un Ku <sup>2</sup>, Ki-Young Kim <sup>3</sup>, Su Shin <sup>3</sup>, Eun-Jin Hong <sup>3</sup>, Sae Kwang Ku <sup>4,\*</sup>, and Jae-Suk Choi <sup>1,\*</sup>

<sup>1</sup> Department of Seafood Science and Technology, The Institute of Marine Industry, Gyeongsang National University, Tongyeong 53064, Republic of Korea; ; 210217@gnu.ac.kr (M.R.K.); evolution\_5237@naver.com (J.-H.L.)

<sup>2</sup> Department of Biomedical Laboratory Science, College of Health and Welfare, Kyungwoon University, Gumi 39160, Republic of Korea; 202121018@ikw.ac.kr

<sup>3</sup> Research Institute, BIO PORT KOREA INC., Busan 46034, Republic of Korea; kyk1967@bioportkorea.com (K.-Y.K.); sshin@bioportkorea.com (S.S.); ejhong@bioportkorea.com (E.-J.H.)

<sup>4</sup> Department of Anatomy and Histology, College of Korean Medicine, Daegu Haany University, Gyeongsan 38610, Republic of Korea

\* Correspondence: gucci200@dhu.ac.kr (S.-K.K.); jsc1008@gnu.ac.kr (J.-S.C.); Tel.: +82-53-819-1549 (S.-K.K.); +82-55-772-9142 (J.-S.C.);

† These authors contributed equally.

**Table S1. Oligonucleotides for quantitative RT-PCR used in this study**

| Target   | 5' – 3'   | Sequence                | GenBank Accession Number |
|----------|-----------|-------------------------|--------------------------|
| NFκB     | Forward   | GCTGCCAAAGAAGGACACGACA  | NM_008689                |
|          | Reverse   | GGCAGGCTATTGCTCATCACAG  |                          |
| PTEN     | Forward   | TGAGTTCCCTCAGCCATTGCCT  | NM_008960                |
|          | Reverse   | GAGGTTTCCTCTGGTCCTGGTA  |                          |
| p38 MAPK | Forward   | CCGAACGATACCAGAACCTGTC  | NM_011951                |
|          | Reverse   | ACGCAACTCTCGGTAGGTCCTT  |                          |
| PI3K     | Forward   | ACCATCAGTGGCTCTGCGGTTT  | NM_008840                |
|          | Reverse   | GTGGTCTTCTGGGAACCTCACCT |                          |
| Akt      | Sense     | GGACTACTGCACTCCGAGAAG   | NM_009652                |
|          | Antisense | CATAGTGGCACCCTCCTTGATC  |                          |
| MUC5AC   | Sense     | CCACTTTCCTTCTCCACACC    | NM_010844                |
|          | Antisense | GGTTGTCGATGCAGCCTTGCTT  |                          |
| MUC5B    | Sense     | CTGAAGACCTGTCGGAACCCAA  | NM_028801                |
|          | Antisense | GCCACACACTTCATCTGGTCCT  |                          |
| Bcl-2    | Sense     | CCTGTGGATGACTGAGTACCTG  | NM_009741                |
|          | Antisense | AGCCAGGAGAAATCAAACAGAGG |                          |
| Bax      | Sense     | AGGATGCGTCCACCAAGAAGCT  | NM_007527                |
|          | Antisense | TCCGTGTCCACGTCAGCAATCA  |                          |
| β-actin  | Sense     | CATTGCTGACAGGATGCAGAAGG | NM_007393                |
|          | Antisense | TGCTGGAAGGTGGACAGTGAGG  |                          |

RT-PCR = Reverse transcription polymerase chain reaction; NF-κB = Nuclear factor kappa-light-chain-enhancer of activated B cells; MAPK = Mitogen-activated protein kinases; PTEN = Phosphatase and tensin homolog, PI3K = Phosphoinositide 3-kinase; Akt = Protein kinase B; Bcl-2 = B-cell lymphoma 2; Bax = Bcl-2-associated X protein.

---

**Disclaimer/Publisher's Note:** The statements, opinions and data contained in all publications are solely those of the individual author(s) and contributor(s) and not of MDPI and/or the editor(s). MDPI and/or the editor(s) disclaim responsibility for any injury to people or property resulting from any ideas, methods, instructions or products referred to in the content.
